# Supplementary material for: Can environmental improvement change the population distribution of walking?
Source: PubMed Central journal article supplement (PMC5484036; doi:10.1136/jech-2016-208417), 2017-05-12
Supplement: jech-2016-208417supp001.pdf [file jech-2016-208417supp001.pdf]

## Additional file 1. Further methodological information

### **Analysis 1: Describing average changes in the sample**

We used a latent growth modelling framework to capture the average change over time and the between-person differences around the average by fitting unconditional latent growth models (example shown in Figure A1). We used 2000 initial random starts and 200 final stage optimisations to fit each model to ensure that a true (rather than a local) maximum likelihood solution had been reached. Overall model fit was determined using the recommendations of Bentler.[1] We used the Tucker Lewis Index (TLI) and the Comparative Fit Index (CFI) [1], with values  $>0.95$  indicating reasonable model fit and values  $>0.90$  indicating a plausible model; and the Standardized Root Mean Residual (SRMR), [2] with values  $<0.05$  indicating reasonable model fit and values  $<0.08$  indicating a plausible model.

**Figure A1:** Examples of unconditional latent growth curve models fitted in Mplus

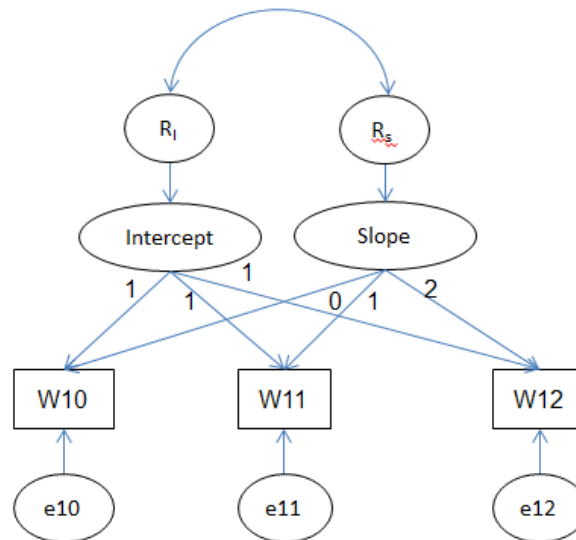

Three observed variables: W10: reported weekly time spent walking in 2010; W11: reported weekly time spent walking in 2011; W12: reported weekly time spent walking in 2012.

Two latent variables: intercept and slope. The intercept is identified by the constant loadings of 1 going to each walking time (constant effect). The slopes are fixed at 0, 1 and 2 representing the yearly intervals between measurements.

Intercept and slope have individual variance (RI and RS respectively). e terms represent individual error terms for reported time spent walking.

### **Analysis 2: Identifying classes**

The standard Likelihood ratio test (LRT) is not valid when using the latent class approaches, so we used the Lo-Mendell-Rubin adjusted LRT and Bayesian Information Criterion (BIC). The Lo-Mendell-Rubin adjusted LRT tests the model that has T classes against the model with T-1 classes, with a significant *P* value indicating that the T-class model provides a better fit to the data. Smaller AIC and BIC values indicate a better fit. Models that best combine goodness of fit and parsimony are indicated by minimum values of the information criteria. The entropy, relative sample sizes for each class, and meaningful interpretation of the classes were also considered. Entropy is a summary statistic based on the membership probabilities that evaluates the quality of the classification in terms of the separation of the latent classes. Values of entropy range from 0 to 1, with scores close to 1 indicating clear classifications.[3]

### **References:**

1. Bentler PM. Comparative fit indices in structural models. *Psychological Bulletin* 1990;107:238-246.
2. Hu L, Bentler PM. Cutoff criteria for fit indexes in covariance structure analysis: Conventional criteria versus new alternatives, *Structural Equation Modeling: A Multidisciplinary Journal* 1999;6:1-55.
3. Muthén L, Muthén B. *Mplus User's Guide*. Seventh Edition. Los Angeles, CA: Muthén & Muthén, 2012.

**Additional file 2: Additional results**

**Table A1:** Average weekly time spent walking in 2010, 2011 and 2012

|                               | <b>2010</b>      | <b>2011</b>      | <b>2012</b>      |
|-------------------------------|------------------|------------------|------------------|
| <b>Total walking</b>          |                  |                  |                  |
| Median (IQR) h/week           | 2.83 (0.75, 6.0) | 2.50 (0.63, 6.0) | 2.50 (0, 5.67)   |
| <b>Walking for transport</b>  |                  |                  |                  |
| Median (IQR) h/week           | 0.92 (0, 2.92)   | 0.75 (0, 2.50)   | 0.75 (0.0, 2.50) |
| <b>Walking for recreation</b> |                  |                  |                  |
| Median (IQR) h/week           | 1.0 (0.0, 3.0)   | 1.0 (0.0, 3.0)   | 1.0 (0.0, 3.0)   |

**Figure A1:** Individual profiles of weekly total walking, walking for transport and for recreation between 2010 and 2012

**A. Total walking**

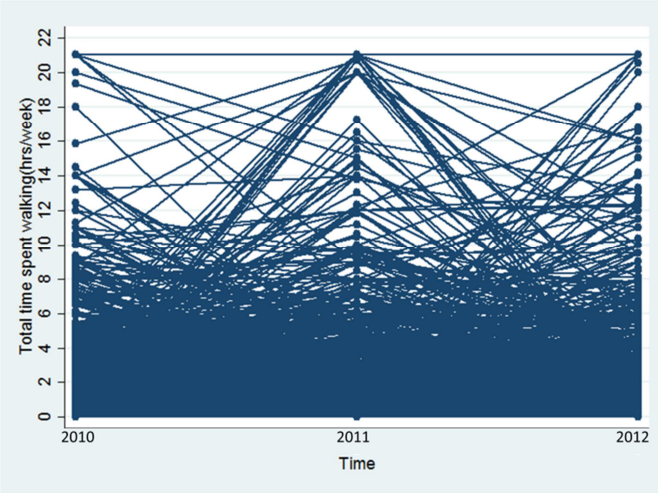

**B. Walking for transport**

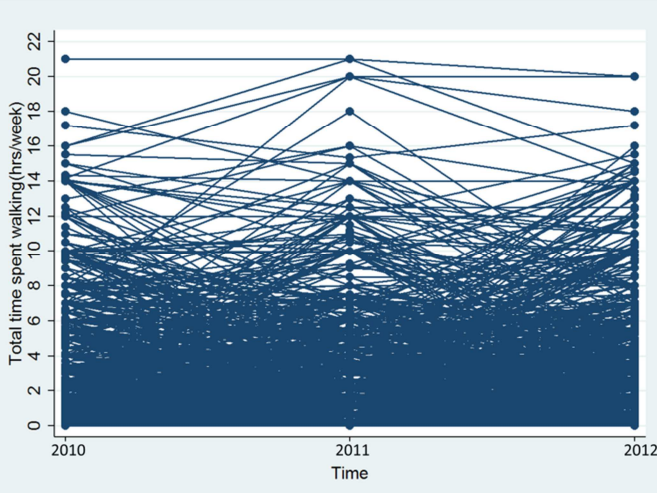

**C. Walking for recreation**

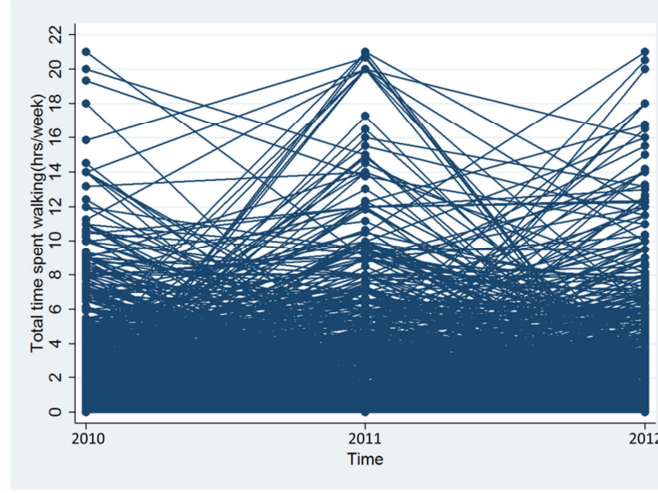

**Figure A2:** Patterns of change in total walking, walking for recreation and walking for transport over two years

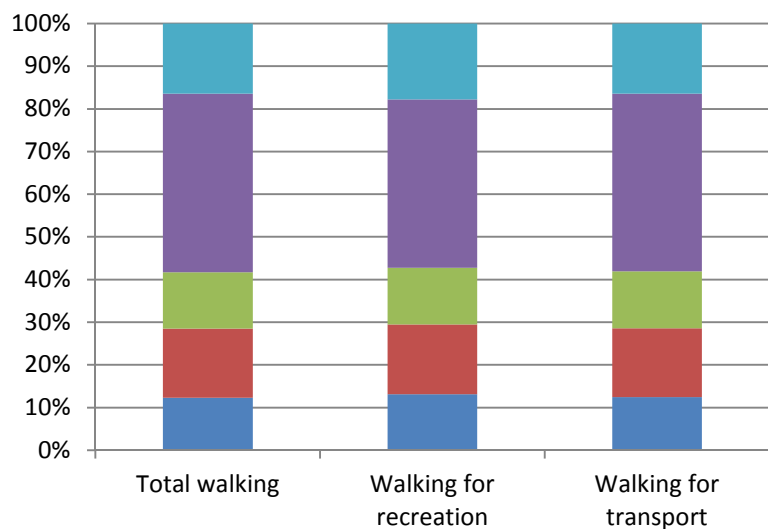

| Description                  | 2010 | 2011 | 2012 |
|------------------------------|------|------|------|
| Never reported any walking   | 0    | 0    | 0    |
| Always reported some walking | 1    | 1    | 1    |
| Took up walking              | 0    | 1    | 1    |
| Gave up walking              | 1    | 0    | 0    |
| Unstable levels of walking   | 0    | 1    | 0    |
|                              | 1    | 0    | 1    |

0=Minimal, 1=Meaningful

**Table A2:** Results of longitudinal latent class analysis using categorical measures and unclassified continuous measures of walking

|                               | Categorical measures |          |          |         | Unclassified continuous measures |           |          |           |           |
|-------------------------------|----------------------|----------|----------|---------|----------------------------------|-----------|----------|-----------|-----------|
|                               | 1 class              | 2 class  | 3 class  | 4 class | 1 class                          | 2 class   | 3 class  | 4 class   | 5 class   |
| <b>Total walking</b>          |                      |          |          |         |                                  |           |          |           |           |
| Likelihood                    | -3759.6              | -3351.53 | -3283.5  | -3282.3 | -10917.20                        | -10138.72 | -9833.87 | -9731.538 | -9654.516 |
| Class distribution [%]        |                      |          |          |         |                                  |           |          |           |           |
| Class 1                       | 100%                 | 43.90%   | 46.60%   | 1.20%   | 100%                             | 85.5%     | 21.2%    | 71.79%    | 5.5%      |
| Class 2                       |                      | 56.10%   | 42.70%   | 10.90%  |                                  | 14.5%     | 73.8%    | 17.62%    | 8.00%     |
| Class 3                       |                      |          | 10.70%   | 42.20%  |                                  |           | 5.0%     | 5.74%     | 62.54%    |
| Class 4                       |                      |          |          | 45.70%  |                                  |           |          | 4.85%     | 4.18%     |
| Class 5                       |                      |          |          |         |                                  |           |          |           | 19.8%     |
| BIC                           | 7540.61              | 6715.78  | 6631.1   | 6650.0  | 21877.12                         | 20348.66  | 19767.42 | 19591.24  | 19507.16  |
| Entropy                       | -                    | 0.737    | 0.731    | 0.770   | -                                | 0.93      | 0.91     | 0.91      | 0.87      |
| n                             | 1237                 | 1237     | 1237     | 1237    | 1237                             | 1237      | 1237     | 1237      | 1237      |
| <b>Walking for recreation</b> |                      |          |          |         |                                  |           |          |           |           |
| Likelihood                    | -4152.62             | -3806.47 | -3689.8  | *       | -9857.67                         | -9104.17  | -8838.27 | -8645.50  | -8546.86  |
| Class distribution [%]        |                      |          |          |         |                                  |           |          |           |           |
| Class 1                       | 100%                 | 45.50%   | 38.90%   |         | 100%                             | 86.0%     | 16.4%    | 79.8%     | 3.9%      |
| Class 2                       |                      | 54.50%   | 39.70%   |         |                                  | 14.0%     | 81.1%    | 11.5%     | 9.6%      |
| Class 3                       |                      |          | 21.40%   |         |                                  |           | 2.5%     | 6.2%      | 79.4%     |
| Class 4                       |                      |          |          |         |                                  |           |          | 2.5%      | 4.5%      |
| Class 5                       |                      |          |          |         |                                  |           |          |           | 2.6%      |
| BIC                           | 8348.12              | 7705.8   | 7522.54  |         | 19758.23                         | 18279.81  | 17776.59 | 17419.64  | 17250.9   |
| Entropy                       | -                    | 0.675    | 0.693    |         | -                                | 0.946     | 0.945    | 0.951     | 0.955     |
| n                             | 1270                 | 1270     | 1270     |         | 1270                             | 1270      | 1270     | 1270      | 1270      |
| <b>Walking for transport</b>  |                      |          |          |         |                                  |           |          |           |           |
| Likelihood                    | -4117.11             | -3768.09 | -3706.59 | *       | -9450.75                         | -8858.87  | -8589.19 | -8389.86  |           |
| Class distribution [%]        |                      |          |          |         | 100%                             | 7.12      | 12.4     | 5.7       | 3.9       |
| Class 1                       | 100%                 | 55.90%   | 38.20%   |         |                                  | 92.8      | 86.2     | 7.2       | 10.8      |
| Class 2                       |                      | 44.10%   | 36.70%   |         |                                  |           | 1.4      | 85.8      | 81.7      |
| Class 3                       |                      |          | 25.10%   |         |                                  |           |          | 1.30      | 2.9       |
| Class 4                       |                      |          |          |         |                                  |           |          |           | 0.6       |
| Class 5                       |                      |          |          |         |                                  |           |          |           |           |
| BIC                           | 8277.07              | 7629.01  | 7556     |         | 18944.35                         | 17789.15  | 17278.35 | 16908.24  |           |
| Entropy                       | -                    | 0.703    | 0.617    |         | -                                | 0.969     | 0.950    | 0.964     | 0.957     |
| n                             | 1262                 | 1262     | 123      |         | 1262                             | 1262      | 1262     | 1262      | 1262      |

\*Models would not converge due to small sample size and overfitting. - No entropy reported for a one-class model.

## Correlation of and separation between class membership for walking for transport and for recreation

**Table A3:** Class membership for walking for transport and walking for recreation

| Walking for transport    | Walking for recreation  |                          |                     |                       |           | Total |
|--------------------------|-------------------------|--------------------------|---------------------|-----------------------|-----------|-------|
|                          | Consistently low levels | Consistently high levels | Sustained increases | Short-lived increases | Decreases |       |
| Consistently low levels  | 869 (85.2)              | 19 (1.9)                 | 33 (3.2)            | 22 (2.2)              | 77 (7.5)  | 1,020 |
| Consistently high levels | 2 (40)                  | 1 (20)                   | 0 (0)               | 0 (0)                 | 2 (40)    | 5     |
| Sustained increases      | 24 (50)                 | 3 (6.2)                  | 7 (14.6)            | 7 (14.6)              | 7 (14.6)  | 48    |
| Short-lived increases    | 16 (43.2)               | 5 (13.5)                 | 2 (5.4)             | 10 (27.1)             | 4 (10.8)  | 37    |
| Decreases                | 91 (66.91)              | 5 (3.7)                  | 8 (5.9)             | 6 (4.4)               | 26 (19.1) | 136   |
| <b>Total</b>             | 1,002                   | 33                       | 50                  | 45                    | 116       | 1,246 |

Numbers of participants (row percentage) classified in each category

**Table A4.** Comparison between assigned and average latent classes for walking for transport and for recreation

| Assigned latent trajectory class | Average latent class assignment probability* |                          |                     |                       |              |
|----------------------------------|----------------------------------------------|--------------------------|---------------------|-----------------------|--------------|
|                                  | Consistently low levels                      | Consistently high levels | Sustained increases | Short-lived increases | Decreases    |
| <b>Walking for transport</b>     |                                              |                          |                     |                       |              |
| Consistently low levels          | <b>0.901</b>                                 | 0.015                    | 0.08                | 0.001                 | 0.004        |
| Consistently high levels         | 0.042                                        | <b>0.933</b>             | 0.021               | 0.001                 | 0.004        |
| Sustained increases              | 0.015                                        | 0.001                    | <b>0.984</b>        | 0.001                 | 0.001        |
| Short-lived increases            | 0.001                                        | 0.001                    | 0.001               | <b>1.0</b>            | 0.001        |
| Decreases                        | 0.016                                        | 0.006                    | 0.006               | 0.001                 | <b>0.972</b> |
| <b>Walking for recreation</b>    |                                              |                          |                     |                       |              |
| Consistently low levels          | <b>0.986</b>                                 | 0.003                    | 0.007               | 0.004                 | 0.001        |
| Consistently high levels         | 0.03                                         | <b>0.912</b>             | 0.03                | 0.028                 | 0.001        |
| Sustained increases              | 0.032                                        | 0.027                    | <b>0.912</b>        | 0.028                 | 0.001        |
| Short-lived increases            | 0.028                                        | 0.035                    | 0.035               | <b>0.898</b>          | 0.005        |
| Decreases                        | 0.001                                        | 0.004                    | 0.014               | 0.008                 | <b>0.973</b> |

\*Respondents were assigned to the latent trajectory classes for which the posterior probability of latent class membership was highest. Accuracy can be judged from the high diagonal and low off-diagonal elements in the assignment matrix.

**Table A5:** Sample sizes for group membership according to latent classes and simple descriptive classifications

|                                         |                       | <b>Walking<br/>for recreation</b> | <b>Walking<br/>for transport</b> |
|-----------------------------------------|-----------------------|-----------------------------------|----------------------------------|
| Latent classes                          | Consistently low      | 1016                              | 1020                             |
|                                         | Short-lived increases | 46                                | 37                               |
|                                         | Sustained increases   | 53                                | 48                               |
|                                         | Total sample          | 1115                              | 1105                             |
| Simple<br>descriptive<br>classification | 0 Never               | 252                               | 264                              |
|                                         | 1 Takes up            | 170                               | 174                              |
|                                         | Total sample          | 422                               | 438                              |

**Table A6:** Logistic regression models of correlates of uptake of walking without reclassification (sensitivity analysis)

| <b>Baseline characteristics</b>                 | <b>Uptake of<br/>any walking<br/>OR (95% CI)</b> | <b>Uptake of walking<br/>for transport<br/>OR (95% CI)</b> | <b>Uptake of walking<br/>for recreation<br/>OR (95% CI)</b> |
|-------------------------------------------------|--------------------------------------------------|------------------------------------------------------------|-------------------------------------------------------------|
| <b>Demographic</b>                              |                                                  |                                                            |                                                             |
| Ethnicity (Ref: white)                          | 1.0                                              | 1.0                                                        | 1.0                                                         |
| Non-white                                       | 1.67 (0.23, 12.00)                               | 1.39 (0.54, 3.59)                                          | 1.30 (0.51, 3.37)                                           |
| Children in the household (Ref: none)           | 1.0                                              | 1.0                                                        | 1.0                                                         |
| Any                                             | 0.98 (0.24, 4.04)                                | 1.10 (0.55, 2.22)                                          | 1.28 (0.65, 2.54)                                           |
| <b>Socio-economic</b>                           |                                                  |                                                            |                                                             |
| Educational level (Ref: Tertiary or equivalent) | 1.0                                              | <b>1.0***</b>                                              | <b>1.0***</b>                                               |
| Secondary school or higher                      | 0.49 (0.21, 1.12)                                | <b>0.63 (0.38, 1.02)</b>                                   | <b>0.66 (0.41, 1.07)</b>                                    |
| Lower than secondary                            | 0.48 (0.20, 1.14)                                | <b>0.32 (0.18, 0.57)</b>                                   | <b>0.34 (0.20, 0.60)</b>                                    |
| Car ownership in the household (Ref: no car)    | 1.0                                              | <b>1.0***</b>                                              | 1.0                                                         |
| No car                                          | 1.26 (0.74, 2.15)                                | <b>2.71 (1.39, 5.28)</b>                                   | 0.68 (0.37, 1.25)                                           |
| Annual household income, £ (Ref: > 40 000)      | 1.0                                              | <b>1.0*</b>                                                | <b>1.0*</b>                                                 |
| 20 001–40 000                                   | 0.62 (0.24, 1.63)                                | <b>0.73 (0.42, 1.26)</b>                                   | <b>0.63 (0.37, 1.08)</b>                                    |
| < 20 000                                        | 0.43 (0.16, 1.10)                                | <b>0.49 (0.27, 0.87)</b>                                   | <b>0.49 (0.28, 0.85)</b>                                    |
| Employment status (Ref: working/ student)       | 1.0                                              | 1.0                                                        | 1.0                                                         |
| Retired                                         | 0.95 (0.34, 2.65)                                | 0.73 (0.36, 1.49)                                          | 0.67 (0.33, 1.35)                                           |
| Unemployed/Other/Sick                           | 1.84 (0.39, 8.63)                                | 0.76 (0.34, 1.71)                                          | 0.74 (0.33, 1.65)                                           |
| <b>Health</b>                                   |                                                  |                                                            |                                                             |
| Weight status (Ref: normal)                     | 1.0                                              | <b>1.0***</b>                                              | <b>1.0*</b>                                                 |
| Overweight                                      | 1.33 (0.63, 2.83)                                | <b>0.91 (0.57, 1.44)</b>                                   | <b>0.90 (0.58, 1.41)</b>                                    |
| Obese                                           | 0.59 (0.24, 1.44)                                | <b>0.38 (0.20, 0.70)</b>                                   | <b>0.40 (0.22, 0.74)</b>                                    |
| General health (Ref: excellent-good)            | <b>1.0***</b>                                    | <b>1.0***</b>                                              | <b>1.0</b>                                                  |
| Fair-poor                                       | <b>0.25 (0.12, 0.52)</b>                         | <b>0.42 (0.26, 0.68)</b>                                   | <b>0.42 (0.26, 0.68)</b>                                    |
| Limiting long-term condition (Ref: no)          | 1.0                                              | 1.0***                                                     | 1.0***                                                      |
| Yes                                             | 0.53 (0.25, 1.11)                                | <b>0.31 (0.19, 0.53)</b>                                   | <b>0.32 (0.19, 0.54)</b>                                    |
| <b>Exposure to C2</b>                           |                                                  |                                                            |                                                             |
| per Kilometre Closer to core C2                 | 1.26 (0.93, 1.70)                                | <b>1.21 (1.00, 1.45)*</b>                                  | 1.14 (0.96, 1.37)                                           |
| <b>Use of Connect2 (Reference: Never)</b>       |                                                  |                                                            |                                                             |
| Any                                             | <b>2.61 (1.19, 5.71)*</b>                        | <b>2.80 (1.78, 4.41)***</b>                                | <b>3.44 (2.02, 5.84)**</b>                                  |

\*Adjusted for site, age and sex. \*p<0.05, \*\*p<0.01, \*\*\*p<0.001; for categorical variables, tests for heterogeneity were used.
